# Supplementary material for: Key Role for the Organic Anion Transporters, OAT1 and OAT3, in the in vivo Handling of Uremic Toxins and Solutes
Source: PubMed Central journal article supplement (PMC5504054; doi:10.1038/s41598-017-04949-2), 2017-07-10
Supplement: 41598_2017_4949_MOESM1_ESM.pdf [file 41598_2017_4949_MOESM1_ESM.pdf]

Key Role of the organic anion transporters, OAT1 and OAT3, in the in vivo Handling of Uremic Toxins and  
Solute

Wei Wu, Kevin T. Bush and Sanjay K. Nigam

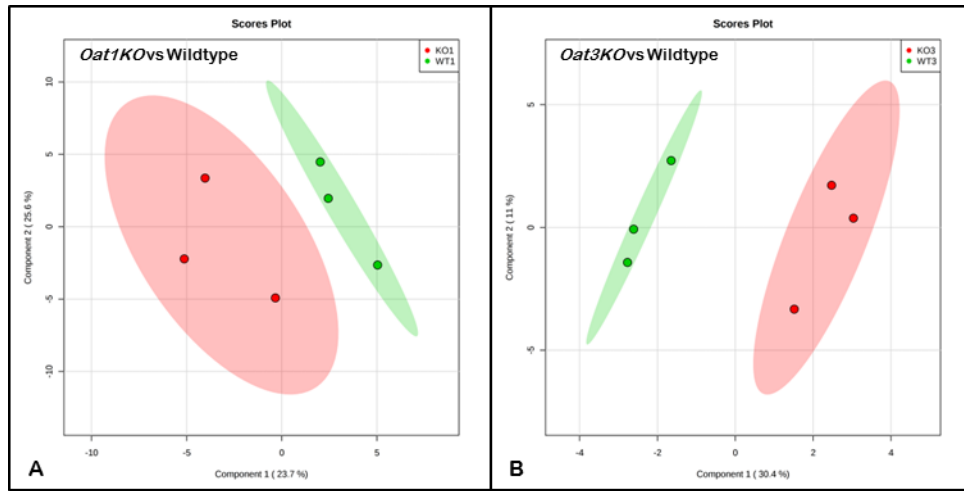

**Supplemental Figure 1.** Partial least squares discrimination analysis reveals separation between plasma metabolites from (A) *Oat1*KO (KO1; red) and wild-type (WT1; green) mice and (B) *Oat3*KO (KO3; red) and wildtype (WT3; green) mice. The dots represent each individual metabolite profile and the shaded areas represent the 95% confidence interval.

| <b>SUPPLEMENTAL TABLE S1</b>                                                   |           |        |           |
|--------------------------------------------------------------------------------|-----------|--------|-----------|
| <b>List of Water-soluble and Protein-bound Uremic Toxins/Retention Solutes</b> |           |        |           |
| Metabolite                                                                     | HMDB      | KEGG   | Metabolon |
| 1,3,7-Trimethyluric acid                                                       | HMDB02123 | -      |           |
| 1,7-Dimethyluric acid                                                          | HMDB11103 | -      |           |
| 1-Methylguanosine                                                              | HMDB01563 | C04545 |           |
| 1-Methylhistidine                                                              | HMDB00001 | C01152 | 30460     |
| 1-Methylinosine                                                                | HMDB02721 | -      |           |
| 1-Methyluric acid                                                              | HMDB03099 | C16359 |           |
| 2,5-Furandicarboxylic acid                                                     | HMDB04812 | -      |           |
| 2-Aminophenol sulphate                                                         | HMDB61116 | -      | 43266     |
| 2-Furoylglycine                                                                | HMDB00439 | -      |           |
| 2-Heptenal                                                                     | HMDB33827 | -      |           |
| 2-Hexenal                                                                      | HMDB31496 | C08497 |           |
| 2-Methoxyphenol sulfate                                                        |           |        |           |
| 2-Nonenal                                                                      | HMDB31269 | -      |           |
| 2-Octenal                                                                      | HMDB30961 | -      |           |
| 2-Oxindole-3-acetate                                                           |           |        | 40479     |
| 3-Aminoisobutanoic acid                                                        | HMDB03911 | C05145 |           |
| 3-carboxy-4-methyl-5-propyl-2-furanpropanoate                                  | HMDB61112 |        | 31787     |
| 3-Deoxyglucosone                                                               |           |        |           |
| 3-Hydroxyhippuric acid                                                         | HMDB06116 | -      |           |
| 3-indoxyl sulfate                                                              | HMDB00682 |        | 27672     |
| 3-Methylcatechol sulfate                                                       |           |        | 46165     |
| 3-Methylglutaryl carnitine                                                     | HMDB00552 | -      |           |
| 3-Methylhistidine                                                              | HMDB00479 | C01152 | 15677     |
| 4-Acetamidobutanoic acid                                                       | HMDB03681 | C02946 | 1558      |
| 4-Decenal                                                                      | HMDB41014 | -      |           |
| 4-guanidinobutanoate                                                           | HMDB03464 | C01035 | 15681     |
| 4-HO-Decenal                                                                   |           |        |           |
| 4-HO-Hexenal                                                                   |           |        |           |
| 4-HO-Nonenal                                                                   |           |        |           |
| 4-HO-Octenal                                                                   |           |        |           |
| 4-Hydroxyhippuric acid                                                         | HMDB13678 | -      | 33959     |
| 4-Methylcatechol sulfate                                                       |           |        | 46146     |
| 4-Pyridoxic acid                                                               | HMDB00017 | C00847 |           |
| 4-Vinylphenol sulfate                                                          |           |        |           |
| 5'-Methylthioadenosine                                                         | HMDB01173 | C00170 | 1419      |
| 6-Sialyl-N-acetyllactosamine                                                   | HMDB06584 | -      |           |
| 7-Methyluric acid                                                              | HMDB11107 | C16355 |           |
| 8-Hydroxy-2'-deoxyguanosine                                                    | HMDB03333 |        |           |
| Acetylcarnosine                                                                | HMDB12881 | -      | 43488     |
| Acisoga                                                                        |           |        |           |
| Allantoin                                                                      | HMDB00462 | C01551 | 1107      |
| Alpha-CEHC glucuronide                                                         |           |        |           |
| Alpha-N-Phenylacetyl-L-glutamine                                               | HMDB06344 | C04148 |           |
| Androsterone sulfate                                                           | HMDB02759 | C04555 |           |
| Angiogenin                                                                     |           |        |           |
| Anthranilate                                                                   | HMDB01123 | C00108 | 4970      |
| Arab(in)itol                                                                   | HMDB01851 | C00532 |           |
| Arabinonic acid                                                                | HMDB00539 | C00878 |           |
| Arabitol §                                                                     | HMDB01851 | C00532 |           |
| Argininic Acid                                                                 | HMDB03148 | -      |           |
| Asymmetric Dimethylarginine                                                    | HMDB01539 | C03626 | 36808     |
| Beta-Alanine                                                                   | HMDB00056 | C00099 |           |
| Cinnamoylglycine                                                               | HMDB11621 | -      | 38637     |
| Citrulline                                                                     | HMDB00904 | C00327 | 2132      |
| C-mannosyltryptophan                                                           |           |        |           |
| Creatine                                                                       | HMDB00064 | C00300 | 27718     |
| Creatinine                                                                     | HMDB00562 | C00791 | 513       |
| Cysteine                                                                       | HMDB00574 | C00097 | 1868      |
| Cytidine                                                                       | HMDB00089 | C00475 | 514       |
| Decanal                                                                        | HMDB11623 | C12307 |           |
| Dihydroxyphenylalanine                                                         | HMDB00181 | C00355 |           |
| Dimethylamine                                                                  | HMDB00087 | C00543 |           |
| Dimethylglycine                                                                | HMDB00092 | C01026 | 5086      |
| D-Threitol                                                                     | HMDB04136 | C16884 |           |
| D-Xylose                                                                       | HMDB00098 | C00181 |           |

|                                    |           |        |       |
|------------------------------------|-----------|--------|-------|
| Erythritol                         | HMDB02994 | C00503 | 20699 |
| Erythronic acid                    | HMDB00613 | -      | 42420 |
| Ethylamine                         | HMDB13231 | C00797 |       |
| Fructoselysine                     | HMDB34879 |        |       |
| Fumaric acid                       | HMDB00134 | C00122 | 1643  |
| Galactitol                         | HMDB00107 | C01697 |       |
| Gamma-CEHC                         | HMDB01931 | -      |       |
| Gamma-CEHC glucuronide             |           |        |       |
| Gluconic acid                      | HMDB00625 | C00257 | 587   |
| Glutaryl carnitine                 | HMDB13130 | -      |       |
| Glycine                            | HMDB00123 | C00037 | 58    |
| Glyoxal                            |           |        |       |
| Guanidine                          | HMDB01842 | C17349 |       |
| Guanidinosuccinic acid             | HMDB03157 | C03139 |       |
| Heptanal                           | HMDB31475 | C14390 |       |
| Hexanal                            | HMDB05994 | C02373 |       |
| Hippurate                          | HMDB00714 | C01586 | 15753 |
| Homocitrulline                     | HMDB00679 | C02427 | 22138 |
| Homocysteine                       | HMDB00742 | C05330 |       |
| Homovanillic acid sulfate          | HMDB11719 | C05582 | 38349 |
| Hypoxanthine                       | HMDB00157 | C00262 | 3127  |
| Imidazolepropionic acid            | HMDB02271 | -      | 40730 |
| Indican                            |           | -      |       |
| Indole-3-methyl acetate            | HMDB29738 | -      |       |
| Indoleacetate                      | HMDB00197 | C00954 | 27513 |
| Indoleacetyl glutamine             | HMDB13240 | -      | 35527 |
| Indolelactic acid                  | HMDB00671 | C02043 | 18349 |
| Indoxyl- $\beta$ -D-glucuronide    | HMDB10319 | C03033 |       |
| Inosine                            | HMDB00195 | C00294 | 1123  |
| Insulin-like growth factor 1       |           |        |       |
| Interleukin-10                     |           |        |       |
| Isobutyrylglycine                  | HMDB00730 | -      |       |
| Isobutyryl-L-carnitine             | HMDB00736 | -      | 33441 |
| Isovalerylglycine                  | HMDB00678 | -      | 35107 |
| Kynurenate                         | HMDB00715 | C01717 | 1417  |
| Kynurenine                         | HMDB00684 | C00328 | 15140 |
| L-Arabinose                        | HMDB00646 | C00259 |       |
| Leptin                             |           |        |       |
| Levoglucofan                       | HMDB00640 | -      |       |
| Levoinositol                       | HMDB34220 | -      |       |
| L-Fucose                           | HMDB00174 | C01019 |       |
| L-gamma-glutamyl-L-isoleucine      | HMDB11170 | -      |       |
| L-Gulonolactone                    | HMDB03466 | C01040 |       |
| L-Xylonate                         | HMDB60256 | C05411 |       |
| Malondialdehyde                    | HMDB06112 | C19440 |       |
| Mannitol                           | HMDB00765 | C00392 | 46142 |
| Melatonin                          | HMDB01389 | C01598 |       |
| Methionine                         | HMDB00696 | C00073 | 1302  |
| Methylglyoxal                      | HMDB01167 | C00546 |       |
| Methylguanidine                    | HMDB01522 | C02294 |       |
| Methylimidazoleacetic acid         | HMDB02820 | C05828 | 32350 |
| Monomethylamine                    | HMDB00164 | C00218 |       |
| myo-inositol                       | HMDB00211 | C00137 | 1124  |
| N1-Methyl-2-pyridone-5-carboxamide | HMDB04193 | C05842 | 40469 |
| N1-methyladenosine                 | HMDB03331 | C02494 | 15650 |
| N2,N2-Dimethylguanosine            | HMDB04824 |        |       |
| N2,N5-diacetylornithine            |           |        |       |
| N4-Acetylcytidine                  | HMDB05923 |        |       |
| N6-carbamoyl-threonyl-adenosine    | HMDB41623 |        | 35157 |
| N6-carboxymethyllysine             |           |        | 36713 |
| N6-Methyladenosine                 | HMDB04044 | -      |       |
| N-Acetyl alliin                    |           |        |       |
| N-acetyl-1-methylhistidine         |           |        | 43255 |
| N-acetyl-3-methylhistidine         |           |        | 43256 |
| N-acetylgarginine                  | HMDB04620 | C02562 | 33953 |
| N-Acetylhistidine                  | HMDB32055 | C02997 | 33946 |
| N-Acetyl-L-alanine                 | HMDB00766 | C00624 | 1585  |
| N-Acetyl-L-methionine              | HMDB11745 | C02712 | 1589  |
| N-Acetyl-L-phenylalanine           | HMDB00512 | C03519 | 33950 |
| N-Acetylneuraminic acid            | HMDB00230 | C19910 | 32377 |
| N-Acetylproline                    |           |        |       |
| N-Acetyls erine                    | HMDB02931 | -      | 37076 |
| N-Acetylthreonine                  |           |        | 33939 |
| N-Acetyltryptophan                 | HMDB13713 |        | 33959 |

|                                                                            |           |        |       |
|----------------------------------------------------------------------------|-----------|--------|-------|
| N-Acetylvaline                                                             | HMDB11757 | -      | 1591  |
| Neopterin                                                                  | HMDB00845 | C05926 |       |
| N-Formyl-L-methionine                                                      | HMDB01015 | C03145 | 2829  |
| Nicotinamide                                                               | HMDB01406 | C00153 | 594   |
| N-methyl-4-pyridone-3-carboxamide                                          | HMDB04194 | C05843 |       |
| Nonanal                                                                    | HMDB59835 |        |       |
| Orotate                                                                    | HMDB00226 | C00295 | 1505  |
| Orotidine                                                                  | HMDB00788 | C01103 | 35172 |
| Osteocalcin                                                                |           |        |       |
| O-sulfo-L-tyrosine                                                         |           |        | 45413 |
| Oxalate (ethanedioate)                                                     | HMDB02329 | C00209 | 20694 |
| Pantothenic acid                                                           | HMDB00210 | C00864 |       |
| p-Cresol sulfate                                                           | HMDB11635 | C01468 | 36103 |
| Pentosidine                                                                | HMDB03933 |        |       |
| Phenol                                                                     | HMDB00228 | C00146 |       |
| Phenol sulphate                                                            | HMDB60015 | C00850 | 32553 |
| Phenylacetic acid                                                          | HMDB00209 | C07086 |       |
| Phenylacetylglutamine                                                      | HMDB06344 | C04148 |       |
| Phenylacetylglycine                                                        | HMDB00821 | C05598 | 33945 |
| Phenylcarnitine                                                            |           |        |       |
| p-Hydroxyphenylacetic acid                                                 | HMDB00755 | C03672 | 32197 |
| p-Hydroxyphenylacetic acid                                                 | HMDB00020 | C00642 |       |
| Proline betaine                                                            | HMDB04827 | C10172 | 34384 |
| Prolylhydroxyproline                                                       | HMDB06695 | -      | 35127 |
| Pseudouridine                                                              | HMDB00767 | C02067 | 33442 |
| Putrescine                                                                 | HMDB01414 | C00134 | 1408  |
| Pyrocatechol sulfate                                                       | HMDB59724 | -      | 35157 |
| Pyroglutamylvaline                                                         |           |        |       |
| Quinolate                                                                  | HMDB00232 | C03722 | 1899  |
| Retinol Binding Protein                                                    |           |        |       |
| Riboflavin                                                                 | HMDB00244 | C00255 |       |
| Saccharin                                                                  | HMDB29723 | C12283 |       |
| S-adenosyl-homocysteine                                                    | HMDB00939 | C00021 | 42382 |
| Salicylic acid                                                             | HMDB00840 | C07588 | 18281 |
| Salicylic acid glucuronide                                                 |           |        |       |
| Scyllitol                                                                  | HMDB06088 | C06153 |       |
| Sorbitol                                                                   | HMDB00247 | C00794 | 46142 |
| Spermidine                                                                 | HMDB01257 | C00315 | 485   |
| Sucrose                                                                    | HMDB00258 | C00089 |       |
| Symmetric Dimethylarginine                                                 | HMDB03334 | C03626 | 36808 |
| Tartaric acid                                                              | HMDB00956 | C00898 |       |
| Taurocyamine                                                               | HMDB03584 | C01959 |       |
| Threitol                                                                   | HMDB04136 | C16884 |       |
| Threonic acid                                                              | HMDB00943 | C01620 | 27738 |
| Tiglylglycine                                                              | HMDB00959 | -      |       |
| Trimethylamine                                                             | HMDB00906 | C00565 |       |
| Trimethylamine N-oxide                                                     | HMDB00925 | C01104 | 40406 |
| Urate                                                                      | HMDB00289 | C00366 | 1604  |
| Urea                                                                       | HMDB00294 | C00086 | 1670  |
| Uridine                                                                    | HMDB00296 | C00299 | 606   |
| Vanillic acid                                                              | HMDB00484 | C06672 |       |
| Vanillylmandelic acid                                                      | HMDB00291 | C05584 |       |
| Vascular endothelial growth factor                                         |           |        |       |
| Xanthine                                                                   | HMDB00292 | C00385 | 3147  |
| Xanthosine                                                                 | HMDB00299 | C01762 | 15136 |
| Xanthurenate                                                               | HMDB00881 | C02470 | 15679 |
| $\alpha$ 1-Acid glycoprotein                                               |           |        |       |
| $\alpha$ -keto- $\delta$ -Guanidinovaleric Acid                            | HMDB04225 | C03771 |       |
| $\beta$ -Guanidinopropionic Acid                                           | HMDB13222 | C03065 |       |
| $\beta$ -Lipotropin                                                        |           |        |       |
| PMID: 22626821; 27467266; 22069747; 23941498; 20378825; 26317986; 19708975 |           |        |       |

**SUPPLEMENTAL TABLE S2**

*Uremic Toxins and/or Retention Solutes for Which In Vitro Data Exists  
Indicating Ability to Interact with OAT1 and/or OAT3*

| Metabolite                                     | HMDB      | KEGG   | Km (uM)                    |                              | Ki (uM)                    |            | IC50 (uM)               |            | PMID                                         |
|------------------------------------------------|-----------|--------|----------------------------|------------------------------|----------------------------|------------|-------------------------|------------|----------------------------------------------|
|                                                |           |        | OAT1                       | OAT3                         | OAT1                       | OAT3       | OAT1                    | OAT3       |                                              |
| 2-Aminobenzoic acid                            | HMDB01123 | C00108 |                            |                              | inhibitor                  | inhibitor  |                         |            | 15944205                                     |
| 3-carboxy-4-methyl-5-propyl-2-furan-propionate | HMDB61112 | -      | 85.3<br>141<br>154         | 18.6<br>26.5<br>10.9<br>6.43 | 103                        | 27.9       | 79                      | 4.01<br>28 | 14675047<br>15846473<br>27467266             |
| Citrulline                                     | HMDB00904 | C00327 | 238<br>373                 |                              |                            |            |                         |            | 19403644                                     |
| Creatinine                                     | HMDB00562 | C00791 | 6.7                        | >10mM                        |                            |            | 14000                   | 40000      | 22338083<br>27467266                         |
| Cysteine                                       | HMDB00574 | C00097 |                            |                              | inhibitor                  | inhibitor  |                         |            | 16164645                                     |
| Hippurate                                      | HMDB00714 | C01586 | 12.2<br>23.5<br>27.5       |                              | 27.5<br>18.8<br>55.6       | 18.6<br>18 | 20<br>2077<br>31        | 11.9<br>41 | 11815391<br>14675047<br>15846473<br>27467266 |
| Hypoxanthine                                   | HMDB00157 | C00262 |                            |                              | inhibitor                  | inhibitor  |                         |            | 16038872                                     |
| Indoleacetate                                  | HMDB00197 | C00954 | 23.6<br>14<br>47.1         |                              | 48.5<br>21                 | 582        | 83<br>140               | 509        | 11815391<br>14675047<br>15846473<br>27467266 |
| Indoxyl sulfate                                | HMDB00682 | -      | 18<br>32.9<br>20.5<br>17.7 | 263<br>174                   | 25<br>13.2<br>22.7<br>34.2 | 138        | 83<br>50<br>47.3<br>110 | 270        | 11815391<br>14675047<br>15846473<br>27467266 |
| Kynurenate                                     | HMDB00715 | C01717 |                            |                              |                            |            | 34                      | 8<br>23    | 15944205<br>27467266                         |
| Kynurenine                                     | HMDB00684 | C00328 |                            |                              | 1.4                        |            | 12                      |            | 21476605                                     |
| p-Cresol sulfate                               | HMDB11635 | -      |                            |                              |                            |            | 210                     | 200        | 27467266                                     |
| Quinolate                                      | HMDB00232 | C03722 |                            |                              | inhibitor                  |            |                         |            | 15944205                                     |
| Spermidine                                     | HMDB01257 | C00315 |                            |                              | 235                        |            | 2000                    |            | 21757732                                     |
| Spermine                                       | HMDB01256 | C00750 |                            |                              | 188                        |            | 1600                    |            | 21757732                                     |
| Uric acid                                      | HMDB00289 | C00366 | 197.6<br>943               | 380.3                        | 304                        | 287        | 312.5<br>2200           | 290<br>670 | 16038872<br>17674156<br>27467266             |
| Xanthine                                       | HMDB00292 | C00385 |                            |                              | 238                        |            | 243.9                   |            | 16038872                                     |
| Xanthurenate                                   | HMDB00881 | C02470 |                            |                              |                            |            | 15                      | 11.5       | 15944205                                     |
